# Supplementary material for: Cross-species evaluation of TANGO2 homologs, including HRG-9 and HRG-10 in Caenorhabditis elegans, challenges a proposed role in heme trafficking
Source: eLife journal article supplement (doi:10.7554/elife.105418), 2025-04-09
Supplement: fig4-data1 [file Figure 4-source data 1.pdf › Figure 4-source data 1.pdf]

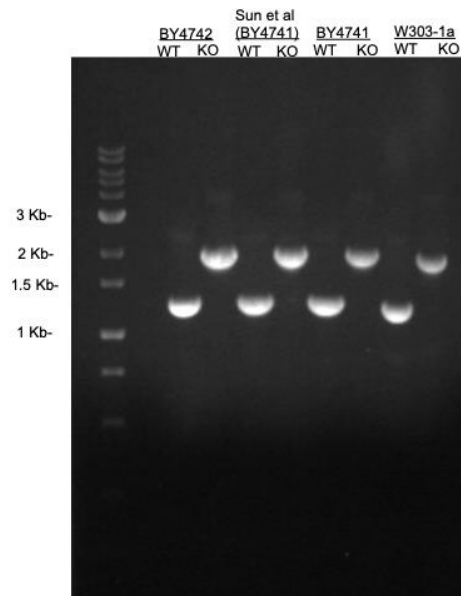

**Source data 2** – The uncropped gel with the relevant bands clearly labelled, corresponding to panel A of Figure 4.
